# Supplementary material for: Investigate the Odontogenic Differentiation and Dentin–Pulp Tissue Regeneration Potential of Neural Crest Cells
Source: PubMed Central journal article supplement (PMC7290043; doi:10.3389/fbioe.2020.00475), 2020-06-05
Supplement: Image_2.pdf [file Image_2.pdf]

Supplementary data

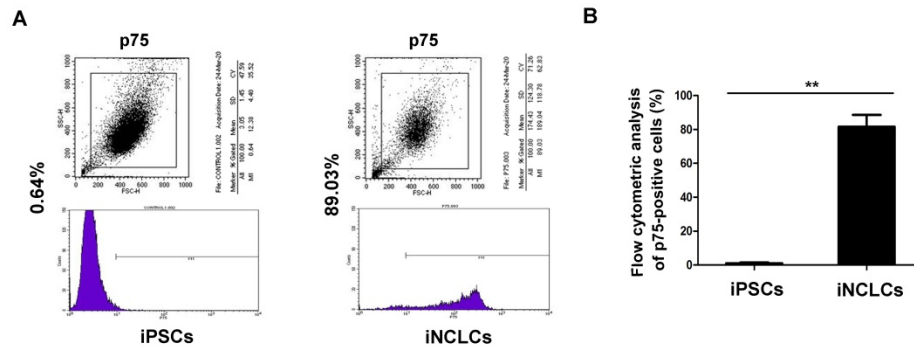

Figure S2. Representative flow cytometric analysis for p75-positive cells among undifferentiated iPSCs and iNCLCs.
