# Supplementary material for: Investigate the Odontogenic Differentiation and Dentin–Pulp Tissue Regeneration Potential of Neural Crest Cells
Source: PubMed Central journal article supplement (PMC7290043; doi:10.3389/fbioe.2020.00475), 2020-06-05
Supplement: Table_1.pdf [file Table_1.pdf]

## Supplementary Data

**Table S1 Tooth formation success rate of mixed cell recombination**

| Origin | Percentage of different origin cells | Percentage of E14.5 dental mesenchyme cells | Number of recombination experiments | Tooth formation success number | Success rate % |
|--------|--------------------------------------|---------------------------------------------|-------------------------------------|--------------------------------|----------------|
| hDPSCs | 100%                                 | 0%                                          | 3                                   | 0                              | 0              |
|        | 50%                                  | 50%                                         | 6                                   | 0                              | 0              |
|        | 25%                                  | 75%                                         | 12                                  | 0                              | 0              |
| NIH3T3 | 100%                                 | 0%                                          | 3                                   | 0                              | 0              |
|        | 50%                                  | 50%                                         | 6                                   | 0                              | 0              |
|        | 25%                                  | 75%                                         | 6                                   | 2                              | 33%            |
| O9-1   | 100%                                 | 0%                                          | 3                                   | 0                              | 0              |
|        | 50%                                  | 50%                                         | 6                                   | 5                              | 83%            |
|        | 25%                                  | 75%                                         | 6                                   | 5                              | 83%            |
